# Supplementary material for: Fecal Klebsiella pneumoniae Carriage Is Intermittent and of High Clonal Diversity
Source: Front Microbiol. 2020 Nov 24;11:581081. doi: 10.3389/fmicb.2020.581081 (PMC7721676; doi:10.3389/fmicb.2020.581081)
Supplement: Supplementary file 1 [file Table_1.XLSX]

## Sheet: K. pneumoniae MedVetKlebs PR
Sample ID	Alias ID(s)	ID - probanden	ST	Complex Type	wzc	wzi	K (primary) x/x genes	K (variant)	O	O -other	K- other	virulence genes	AMR genes	plasmids
510370-18	MVK-05C203	2-47-1	4113	2879	903	2	KL30 (none, 16/20, 99%)		O3b		gmd, rfaG	mceA, mceB, mceC, mceD, mceE, mceG, mceH, mceI, mceJ, mrkA, mrkB, mrkC, mrkD, mrkF, mrkH, mrkI, mrkJ	baeR, CRP, emrB, emrR, E.coli EF-Tu mutants conferring Pulvomycin R, E. coli marR mutant conferrring AbR, E. coli UhpT mutation conferring fosfomycin R, FosA5, H-NS, Kp acrA, Kp OmpK37, marA, msbA, oqxA, SHV-142, vgaC	IncFIB(K), IncFII
510069-18	?	5-29-2	299	2740	7	7	KL7		O2v1	manB, manC	gmd, rfaG	kvgA, mrkB, mrkH, mrkI, mrkJ	baeR, CRP, emrB, emrR, E.coli EF-Tu mutants conferring Pulvomycin R, E. coli marR mutant conferrring AbR, E. coli UhpT mutation conferring fosfomycin R, FosA6, H-NS, Kp acrA, Kp OmpK37, marA, msbA, oqxA, SHV-1, vgaC	Col440I, IncFIA(HI1), IncFIB(K), IncFII(K)
510042-18	?	5-21-1	22	2728	9	9	KL9		O2v2	rfbA - D	gmd, wcpO, rfaG	mrkA, mrkB, mrkC, mrkD, mrkF, mrkH, mrkI, mrkJ	baeR, CRP, emrB, emrR, E.coli EF-Tu mutants conferring Pulvomycin R, E. coli marR mutant conferrring AbR, E. coli UhpT mutation conferring fosfomycin R, FosA6, H-NS, Kp acrA, Kp OmpK37, marA, msbA, oqxA, SHV-1, vgaC
510052-18	?	5-22-1	22	2728	9	9	KL9		O2v2	rfbA - D	gmd, wcpO, rfaG	mrkA, mrkB, mrkC, mrkD, mrkF, mrkH, mrkI, mrkJ	baeR, CRP, emrB, emrR, E.coli EF-Tu mutants conferring Pulvomycin R, E. coli marR mutant conferrring AbR, E. coli UhpT mutation conferring fosfomycin R, FosA6, H-NS, Kp acrA, Kp OmpK37, marA, msbA, oqxA, SHV-1, vgaC
510931-19	MVK-05C320	6-12-1	611	3313	45	9	KL45		O2v2	rfbA-D	gmd, rfaG	fyuA, irp1, irp2, mrkA, mrkB, mrkC, mrkD, mrkH, mrkI, mrkJ, ybtA, ybtE, ybtP, ybtQ, ybtS, ybtT, ybtU, ybtX	baeR, CRP, emrB, emrR, E.coli EF-Tu mutants conferring Pulvomycin R, E. coli marR mutant conferrring AbR, E. coli UhpT mutation conferring fosfomycin R, FosA6, H-NS, Kp acrA, Kp OmpK37, marA, msbA, oqxA, SHV-27, vgaC	IncHI1B
510077-18	?	1-30-2	306	2744	12	11	KL11		O3/O3a		manB, manC, gmd	allD, allS, arcC, glxR, mrkA, mrkB, mrkD, mrkF, mrkH, mrkI, mrkJ	baeR, CRP, emrB, emrR, E.coli EF-Tu mutants conferring Pulvomycin R, E. coli marR mutant conferrring AbR, E. coli UhpT mutation conferring fosfomycin R, FosA6, H-NS, Kp acrA, Kp OmpK37, marA, msbA, oqxA, SHV-1
510851-19	MVK-05C240	4-49-1	913	3060	940	16	KL111		O3b		manB, manC, gmd	kfuA, kfuB, kfuC, mceA, mceB, mceC, mceD, mceE, mceG, mceH, mceI, mceJ, mrkA, mrkB, mrkC, mrkD, mrkF, mrkH, mrkI, mrkJ	baeR, CRP, emrB, emrR, E.coli EF-Tu mutants conferring Pulvomycin R, E. coli marR mutant conferrring AbR, E. coli UhpT mutation conferring fosfomycin R, FosA6, FosA7, H-NS, Kp acrA, Kp OmpK37, marA, mexF, msbA, oprN, oqxA, oqxB, SHV-28	IncFIB(K), IncFII(K)
510945-19	MVK-05C334	6-13-3	4123	3318	58	22	KL58		O3b		gmd	mrkA, mrkB, mrkC, mrkD, mrkF, mrkH, mrkI, mrkJ	baeR, CRP, emrB, emrR, E.coli EF-Tu mutants conferring Pulvomycin R, E. coli marR mutant conferrring AbR, E. coli UhpT mutation conferring fosfomycin R, FosA5, H-NS, Kp acrA, Kp OmpK37, marA, msbA, oqxA, SHV-11, vgaC	IncFIB(K), IncFII(K)
510066-18	?	4-26-3	492	2737	15	23	KL14		O3b	rfaA-D, manB	gmd	mrkA, mrkB, mrkC, mrkD, mrkF, mrkH, mrkI, mrkJ	baeR, CRP, emrB, emrR, E.coli EF-Tu mutants conferring Pulvomycin R, E. coli marR mutant conferrring AbR, E. coli UhpT mutation conferring fosfomycin R, FosA5, H-NS, Kp acrA, Kp OmpK37, marA, msbA, oqxA, SHV-11	Col440I, IncFIB(pKPHS1)
510940-19	MVK-05C329	6-13-2	788	3316	914	26	KL46		O3b		gmd	mrkA, mrkB, mrkC, mrkD, mrkF, mrkH, mrkI, mrkJ	baeR, CRP, emrB, emrR, E.coli EF-Tu mutants conferring Pulvomycin R, E. coli marR mutant conferrring AbR, E. coli UhpT mutation conferring fosfomycin R, FosA5, H-NS, Kp acrA, Kp OmpK37, marA, msbA, oqxA, SHV-52, tet©	IncFIB(K)
510050-18	?	4-22-2	34	2731	23	27	KL37 /none, 12/18)		O1v1	wbbY, wbbZ	mgmD, rfaG, wzx	mrkA, mrkH, mrkI, mrkJ	baeR, CRP, emrB, emrR, E.coli EF-Tu mutants conferring Pulvomycin R, E. coli marR mutant conferrring AbR, E. coli UhpT mutation conferring fosfomycin R, FosA5, H-NS, Kp acrA, Kp OmpK37, marA, msbA, oqxA, SHV-71	Col440I, IncFIB(K), IncFII(K)
510128-18	?	4-38-2	101	2765	921	29	KL106 (none, 14/18)		O1v2	wbbY, wbbZ	gmd, rfaG, wcpO	kfuA, kfuB, kfuC, mrkA, mrkB, mrkC, mrkD, mrkF, mrkH, mrkI, mrkJ	baeR, CRP, emrB, emrR, E.coli EF-Tu mutants conferring Pulvomycin R, E. coli marR mutant conferrring AbR, E. coli UhpT mutation conferring fosfomycin R, FosA6, H-NS, Kp acrA, Kp OmpK37, marA, msbA, oqxA, SHV-1	IncFIB(K), IncR
510894-19	MVK-05C283	6-7-1	4121	3450	921	29	KL106 (none, 13/18, 99%)		O2v2		gmd, rfaG, wcpO	mrkA, mrkB, mrkC, mrkD, mrkF, mrkH, mrkI, mrkJ	aadA, baeR, CRP, emrB, emrR, E.coli EF-Tu mutants conferring Pulvomycin R, E. coli marR mutant conferrring AbR, E. coli UhpT mutation conferring fosfomycin R, FosA6, H-NS, Kp acrA, Kp OmpK37, marA, mfbA, msbA, oqxA, SAT-2 SHV-168, tet(A), tetR	IncFIB(Mar), IncHI1B
510065-18	?	4-26-2	704	2739	32	31	Kl31		O1v1	manB, manC, wbbY, wbbZ	gmd, rfaG	fyuA, irp1, irp2, mrkB, mrkC, mrkH, mrkI, ybtA, ybtE, ybtP, ybtQ, ybtS, ybtT, ybtU, ybtX	baeR, CRP, emrB, emrR, E.coli EF-Tu mutants conferring Pulvomycin R, E. coli marR mutant conferrring AbR, E. coli UhpT mutation conferring fosfomycin R, FosA5, H-NS, Kp acrA, Kp OmpK37, marA, msbA, oqxA, SHV-36, vgaC	Col440I, IncFIB(K), IncFII(K)
510920-19	MVK-05C309	6-10-2	4122	3281	32	31	KL31		O1v1		gmd, rfaG	fyuA, irp1, irp2, mrkA, mrkB, mrkD, mrkH, mrkI, ybtA, ybtE, ybtP, ybtQ, ybtS, ybtT, ybtU, ybtX	baeR, CRP, emrB, emrR, E.coli EF-Tu mutants conferring Pulvomycin R, E. coli marR mutant conferrring AbR, E. coli UhpT mutation conferring fosfomycin R, FosA5, H-NS, Kp acrA, marA, msbA, oqxA, SHV-36, vgaC	IncFIA(HI1), IncFIB(K), IncFII(Yp)
510060-18	?	6-24-1	200	2734	14	39	KL13		O3b		gmd	mrkA, mrkB, mrkC, mrkD, mrkF, mrkH, mrkI, mrkJ	baeR, CRP, emrB, emrR, E.coli EF-Tu mutants conferring Pulvomycin R, E. coli marR mutant conferrring AbR, E. coli UhpT mutation conferring fosfomycin R, FosA5, H-NS, Kp acrA, Kp OmpK37, marA, msbA, oqxA, SHV-1	Col440II
510070-18	?	5-29-3	1430	2741	41	39	KL107		OL102	rfbA - D	rmlA-D,	mrkA, mrkB, mrkF, mrkH, mrkI, mrkJ	baeR, CRP, emrB, emrR, E.coli EF-Tu mutants conferring Pulvomycin R, E. coli marR mutant conferrring AbR, E. coli UhpT mutation conferring fosfomycin R, FosA6, H-NS, Kp acrA, Kp OmpK37, marA, msbA, oqxA, SHV-26, tet(D)	Col440II, IncFIB(K), IncR
510046-18	?	2-22-1	301	2729	42	42	KL42		O4		ugd, gmd	mrkA, mrkB, mrkC, mrkD, mrkF, mrkH, mrkI, mrkJ, ybtA, ybtQ, ybtS, ybtT, ybtX	baeR, CRP, emrB, emrR, E.coli EF-Tu mutants conferring Pulvomycin R, E. coli marR mutant conferrring AbR, E. coli UhpT mutation conferring fosfomycin R, FosA6, H-NS, Kp acrA, Kp OmpK37, marA, msbA, oqxA, SHV-27
510064-18	?	4-26-1	4098	2735	47	47	KL47		O1v1	rfbA - D, wbbY, wbbZ	gmd, rfaG	kfuA, kfuB, kfuC, mrkB, mrkC, mrkD, mrkF, mrkH, mrkI, mrkJ	baeR, CRP, emrB, emrR, E.coli EF-Tu mutants conferring Pulvomycin R, E. coli marR mutant conferrring AbR, E. coli UhpT mutation conferring fosfomycin R, FosA5, H-NS, Kp acrA, Kp OmpK37, marA, msbA, oqxA, SHV-75, vgaC	Col440I, IncFIA(HI1), IncFIB(K), IncFII(K)
510030-18	?	6-20-1	253	2722	919	50	KL15		O4		gmd	mrkH, mrkI	baeR, CRP, emrB, emrR, E.coli EF-Tu mutants conferring Pulvomycin R, E. coli marR mutant conferrring AbR, E. coli UhpT mutation conferring fosfomycin R, FosA5, H-NS, Kp acrA, marA, msbA, oqxA, SHV-36, vgaC	IncFIB(K), IncFII(K), IncR
510340-18	MVK-05C173	2-45-1	322	2876	18	50	KL17 (none, 13/20		O4	rfbA-D	gmd	mrkA, mrkB, mrkC, mrkD, mrkF, mrkH, mrkI, mrkJ	baeR, CRP, emrB, emrR, E.coli EF-Tu mutants conferring Pulvomycin R, E. coli marR mutant conferrring AbR, E. coli UhpT mutation conferring fosfomycin R, FosA6, H-NS, Kp OmpK37, marA, msbA, oqxA, SHV-11	Col440I, Col440II, IncFIB(K), IncFII
510902-19	MVK-05C291	2-8-1	322	2876	18	50	KL17		O4	rfbA-D	gmd	mrkA, mrkB, mrkC, mrkD, mrkF, mrkH, mrkI, mrkJ	baeR, CRP, emrB, emrR, E.coli EF-Tu mutants conferring Pulvomycin R, E. coli marR mutant conferrring AbR, E. coli UhpT mutation conferring fosfomycin R, FosA6, H-NS, Kp OmpK37, marA, msbA, oqxA, SHV-11	Col440I, Col440II, IncFIB(K), IncFII
510068-18	?	5-29-1	889	2738	903	73	KL104 (none, 16/23)		O1v1	manB, manC, wbbY, wbbZ, gmlC	gmd, rfaG	KP1_1371. allD, kfuA, kfuB, kfuC, mrkA, mrkB, mrkC, mrkD, mrkF, mrkH, mrkI, mrkJ	baeR, CRP, emrB, emrR, E.coli EF-Tu mutants conferring Pulvomycin R, E. coli marR mutant conferrring AbR, E. coli UhpT mutation conferring fosfomycin R, FosA6, H-NS, Kp acrA, Kp OmpK37, marA, msbA, oqxA, qnrS2, SHV-108, vgaC	Col440II, IncFIB(K), IncFII(K), IncX3
510029-18	?	2-19-1	469	2721		75	KL105		O3b	rfbA - D	manB, manC, gmd	mrkA, mrkB, mrkC, mrkD, mrkF, mrkH, mrkI, mrkJ	baeR, CRP, emrB, emrR, E.coli EF-Tu mutants conferring Pulvomycin R, E. coli marR mutant conferrring AbR, E. coli UhpT mutation conferring fosfomycin R, FosA5, H-NS, Kp acrA, Kp OmpK37, marA, msbA, oqxA, SHV-11
510112-18	?	4-36-1	469	2721		75	KL105		O3b	rfbA-D	manB, manC, gmd	mrkA, mrkB, mrkC, mrkD, mrkF, mrkH, mrkI, mrkJ	baeR, CRP, emrB, emrR, E.coli EF-Tu mutants conferring Pulvomycin R, E. coli marR mutant conferrring AbR, E. coli UhpT mutation conferring fosfomycin R, FosA5, H-NS, Kp acrA, Kp OmpK37, marA, msbA, oqxA, SHV-11
510320-18	MVK-05C153	2-44-1	252	2874	76	81	KL81		O1v2	rfbA-D, wbbY, wbbZ	gmd, rfaG, wcpO	mrkA, mrkD, mrkF, mrkH, mrkI, mrkJ	baeR, CRP, emrB, emrR, E.coli EF-Tu mutants conferring Pulvomycin R, E. coli marR mutant conferrring AbR, E. coli UhpT mutation conferring fosfomycin R, FosA6, H-NS, Kp acrA, Kp acrR mutant conferring MDR, Kp OmpK37, marA, msbA, oqxA, SHV-1, vgaC	IncFIB(K), IncFII(K)
510001-18	?	6-15-1	314	2687	24	82	KL23		O2v2	rfbA - D	gmd, wcpO, rfaG	mrkA, mrkB, mrkC, mrkD, mrkF, mrkH, mrkI, mrkJ	baeR, CRP, emrB, emrR, E.coli EF-Tu mutants conferring Pulvomycin R, E. coli marR mutant conferrring AbR, E. coli UhpT mutation conferring fosfomycin R, FosA6, H-NS, Kp acrA, Kp OmpK37, marA, msbA, oqxA, SHV-1
510871-19	MVK-05C260	2-50-1	37	3275	24	83	KL23		O2v2	rfbA-D	gmd, rfaG, wcpO	mrkA, mrkB, mrkC, mrkD, mrkF, mrkH, mrkI, mrkJ	baeR, CRP, emrB, emrR, E.coli EF-Tu mutants conferring Pulvomycin R, E. coli marR mutant conferrring AbR, E. coli UhpT mutation conferring fosfomycin R, FosA5, H-NS, Kp acrA, Kp OmpK37, marA, msbA, oqxA, SHV-11
510113-18	?	4-36-2	4102	2758	29	84	KL28		O1v2	manB, manC, wbbY, wbbZ	gmd, rfaG, wcpO	mrkA, mrkB, mrkC, mrkD, mrkF, mrkH, mrkI, mrkJ	baeR, CRP, emrB, emrR, E.coli EF-Tu mutants conferring Pulvomycin R, E. coli marR mutant conferrring AbR, E. coli UhpT mutation conferring fosfomycin R, FosA5, H-NS, Kp acrA, Kp OmpK37, marA, msbA, oqxA, SHV-187	Col440II
510306-18	MVK-05C139	4-41-1	1159	2870	29	84	KL28 (low)		O2v1	manB, manC		mrkA, mrkB, mrkC, mrkD, mrkF, mrkH, mrkI, mrkJ	baeR, CRP, emrB, emrR, E.coli EF-Tu mutants conferring Pulvomycin R, E. coli marR mutant conferrring AbR, E. coli UhpT mutation conferring fosfomycin R, FosA6, H-NS, Kp acrA, Kp OmpK37, marA, msbA, oqxA, SHV-11
510929-19	MVK-05C318	4-11-3	20	3312	29	84	KL28		O1v2	manB, manC, wbbY, wbbZ	gmd, rfaG, wcpO	fyuA, irp1, irp2, mrkH, mrkI, mrkJ, ybtA, ybtE, ybtP, ybtQ, ybtS, ybtT, ybtU, ybtX	baeR, CRP, emrB, emrR, E.coli EF-Tu mutants conferring Pulvomycin R, E. coli marR mutant conferrring AbR, E. coli UhpT mutation conferring fosfomycin R, FosA5, H-NS, Kp acrA, Kp OmpK37, marA, msbA, oqxA, SHV-187, vgaC	IncR
510089-18	?	4-32-2	37	2751	930	85	KL125		O3/O3a		manB, manC, gmd	mrkA, mrkB, mrkC, mrkD, mrkF, mrkH, mrkI, mrkJ	baeR, CRP, emrB, emrR, E.coli EF-Tu mutants conferring Pulvomycin R, E. coli marR mutant conferrring AbR, E. coli UhpT mutation conferring fosfomycin R, FosA6, H-NS, Kp acrA, Kp OmpK37, marA, msbA, oqxA, SHV-51	IncHI1B, IncR
510017-18	?	2-17-1	152	2695	22	87	KL163		O1v1	manB, manC, wbbY, wbbZ	gmd, rfaG	mrkA, mrkF, mrkH, mrkI	baeR, CRP, emrB, emrR, E.coli EF-Tu mutants conferring Pulvomycin R, E. coli marR mutant conferrring AbR, E. coli UhpT mutation conferring fosfomycin R, FosA6, H-NS, Kp OmpK37, marA, msbA, oqxA, SHV-1, vgaC	FII(pBK30683), IncFIA(HI1), IncFIB(K), IncFII(K), IncR
510059-18	?	1-23-4	277	2733	914	97	KL46		O3b	manB	manB, manC, gmd	mrkA, mrkB, mrkD, mrkF, mrkH, mrkI, mrkJ	baeR, CRP, emrB, emrR, E.coli EF-Tu mutants conferring Pulvomycin R, E. coli marR mutant conferrring AbR, E. coli UhpT mutation conferring fosfomycin R, FosA6, H-NS, Kp OmpK37, marA, msbA, oqxA, SHV-27	Col440I, IncFIB(K), IncFII(K)
510336-18	MVK-05C169	5-45-1	45	2894	25	101	KL24 (none, 14/19		O2v1	manB, manC	gmd, rfaG	fyuA, irp1, irp2, mrkA, mrkB, mrkC, mrkD, mrkH, mrkI, mrkJ, ybtA, ybtE, ybtP, ybtQ, ybtS, ybtT, ybtU, ybtX	baeR, CRP, emrB, emrR, E.coli EF-Tu mutants conferring Pulvomycin R, E. coli marR mutant conferrring AbR, E. coli UhpT mutation conferring fosfomycin R, FosA6, H-NS, Kp acrA, Kp OmpK37, marA, msbA, oqxA, SHV-1, vgaC	Col440I, IncFII, IncR
510366-18	MVK-05C199	6-46-1	192	2877	940	113	Kl111 /none, 10/17)		O3b		manB, manC, gmd	fyuA, irp1, irp2, mrkA, mrkB, mrkC, mrkD, mrkH, mrkI, mrkJ, ybtA, ybtE, ybtP, ybtQ, ybtS, ybtT, ybtU, ybtX	baeR, CRP, emrB, emrR, E.coli EF-Tu mutants conferring Pulvomycin R, E. coli marR mutant conferrring AbR, E. coli UhpT mutation conferring fosfomycin R, FosA5, H-NS, Kp acrA, Kp OmpK37, marA, msbA, oqxA, SHV-60, vgaC	IncFIA(HI1), IncHI1B, IncR
510378-18	MVK-05C211	6-47-1	192	2877	940	113	KL111		O3b	manB, manC, wbbY, wbbZ	manB, manC, gmd	fyuA, irp1, irp2, mrkA, mrkB, mrkC, mrkD, mrkH, mrkI, mrkJ, ybtA, ybtE, ybtP, ybtQ, ybtS, ybtT, ybtU, ybtX	baeR, CRP, emrB, emrR, E.coli EF-Tu mutants conferring Pulvomycin R, E. coli marR mutant conferrring AbR, E. coli UhpT mutation conferring fosfomycin R, FosA5, H-NS, Kp acrA, Kp OmpK37, marA, msbA, oqxA, SHV-60, vgaC	IncFIA(HI1), IncHI1B, IncR
510076-18	?	1-30-1	4099	2743	940	114	KL111		O3b		manB, manC, gmd	mrkA, mrkB, mrkD, mrkF, mrkH, mrkI, mrkJ	baeR, CRP, emrB, emrR, E.coli EF-Tu mutants conferring Pulvomycin R, E. coli marR mutant conferrring AbR, E. coli UhpT mutation conferring fosfomycin R, FosA6, H-NS, Kp OmpK37, marA, msbA, oqxA, SHV-1, vgaC
510071-18	?	5-29-4	3626	2768	8	114	KL8		O3b		manB, manC, gmd	kfuA, kfuB, kfuC, mrkC, mrkD, mrkH, mrkI,	baeR, CRP, emrB, emrR, E.coli EF-Tu mutants conferring Pulvomycin R, E. coli marR mutant conferrring AbR, E. coli UhpT mutation conferring fosfomycin R, FosA6, H-NS, Kp acrA, Kp OmpK37, marA, msbA, oqxA, rpoB2, SHV-37	IncFIB(K), IncR
510325-18	MVK-05C158	4-45-2	1141	2893	940	114	KL111 (low)		O3b			kfuA, kfuB, kfuC, mrkA, mrkB, mrkC, mrkD, mrkF, mrkH, mrkI, mrkJ	baeR, CRP, emrB, emrR, E.coli EF-Tu mutants conferring Pulvomycin R, E. coli marR mutant conferrring AbR, E. coli UhpT mutation conferring fosfomycin R, FosA6, FosA7, H-NS, Kp acrA, Kp OmpK37, marA, msbA, oqxA, SHV-11, vgaC	Col440I, IncFIB(K), IncFIB(pKPHS1), IncFII(K)
510884-19	MVK-05C273	5-6-1	34	3278	940	114	KL111		O3b		manB, manC, gmd	mrkA, mrkB, mrkC, mrkD, mrkF, mrkH, mrkI, mrkJ	baeR, CRP, emrB, emrR, E.coli EF-Tu mutants conferring Pulvomycin R, E. coli marR mutant conferrring AbR, E. coli UhpT mutation conferring fosfomycin R, FosA6, H-NS, Kp acrA, Kp OmpK37, marA, msbA, oqxA, SHV-50, vgaC	IncFII(K), IncR
510067-18	?	4-26-4	530	2736	54	115	KL54		O1v2	manB, manC, wbbY, wbbZ	gmd, wcpO, rfaG	mrkA, mrkB, mrkC, mrkD, mrkF, mrkH, mrkI, mrkJ	baeR, CRP, emrB, emrR, E.coli EF-Tu mutants conferring Pulvomycin R, E. coli marR mutant conferrring AbR, E. coli UhpT mutation conferring fosfomycin R, FosA5, H-NS, Kp OmpK37, marA, msbA, oqxA, SHV-1, vgaC	Col440I, IncFIB(K), IncFII(K), IncN3
510013-18	?	5-16-1	37	2692		123	KL136		O2v2		gmd, wcpO, rfaG	kgvA, mrkA, mrkB, mrkC, mrkD, mrkF, mrkH, mrkI, mrkJ	baeR, CRP, emrB, emrR, E.coli EF-Tu mutants conferring Pulvomycin R, E. coli marR mutant conferrring AbR, E. coli UhpT mutation conferring fosfomycin R, FosA5, H-NS, Kp acrA, Kp OmpK37, marA, msbA, oqxA, SHV-11	Col440I, Col440II, IncFIB(K), IncR
510027-18	?	5-17-3	37	2692		123	KL136		O2v2		gmd, wcpO, rfaG	mrkA, mrkB, mrkC, mrkD, mrkF, mrkH, mrkI, mrkJ	baeR, CRP, emrB, emrR, E.coli EF-Tu mutants conferring Pulvomycin R, E. coli marR mutant conferrring AbR, E. coli UhpT mutation conferring fosfomycin R, FosA6, H-NS, Kp acrA, Kp OmpK37, marA, msbA, oqxA, SHV-11	Col440I, Col440II, IncFIB(K), IncR
510041-18	?	4-21-4	461	2727		123	KL136		O2v1	wbbY, wbbZ	gmd, wcpO, rfaG	kfuA, kfuB, kfuC, mrkC, mrkD, mrkF, mrkH, mrkI, mrkJ	baeR, CRP, emrB, emrR, E.coli EF-Tu mutants conferring Pulvomycin R, E. coli marR mutant conferrring AbR, E. coli UhpT mutation conferring fosfomycin R, FosA5, H-NS, Kp acrA, Kp OmpK37, marA, msbA, oqxA, SHV-1, vgaC	IncFIB(K), IncFIB(pKPHS1), IncFII(K), IncFII(Yp)
510009-18	?	4-16-1	4087	2690	58	130	KL58 (none, 17/22)		O3b		gmd	mrkA, mrkB, mrkC, mrkD, mrkF, mrkH, mrkI, mrkJ	baeR, CRP, emrB, emrR, E.coli EF-Tu mutants conferring Pulvomycin R, E. coli marR mutant conferrring AbR, E. coli UhpT mutation conferring fosfomycin R, FosA6, H-NS, Kp acrA, Kp OmpK37, marA, msbA, oqxA, SHV-11
510127-18	?	4-38-1	461	4860	26	133	KL25		O1v1	wbbY, wbbZ	gmd, rfaG	kfuA, kfuB, kfuC, kvgA, mrkA, mrkH, mrkI, mrkJ	baeR, CRP, emrB, emrR, E.coli EF-Tu mutants conferring Pulvomycin R, E. coli marR mutant conferrring AbR, E. coli UhpT mutation conferring fosfomycin R, FosA5, H-NS, Kp acrA, Kp OmpK37, marA, msbA, oqxA, SHV-1, vgaC	Col(IMGS31), IncFIB(K), IncFII(K)
510090-18	?	4-32-3	45	2753	62	149	KL62		O2v1	manB, manC	gmd, rfaG	fyuA, irp1, irp2, mrkA, mrkB, mrkC, mrkD, mrkH, mrkI, mrkJ, ybtA, ybtE, ybtP, ybtQ, ybtS, ybtT, ybtU, ybtX	baeR, CRP, emrB, emrR, E.coli EF-Tu mutants conferring Pulvomycin R, E. coli marR mutant conferrring AbR, E. coli UhpT mutation conferring fosfomycin R, FosA6, H-NS, Kp acrA, Kp OmpK37, marA, msbA, oqxA, SHV-1	IncHI1B, IncFII(K)
510092-18	?	4-33-1	200	2754	28	150	KL27		O3b		manB, manC, gmd	mrkA, mrkB, mrkC, mrkD, mrkF, mrkH, mrkI, mrkJ	baeR, CRP, emrB, emrR, E.coli EF-Tu mutants conferring Pulvomycin R, E. coli marR mutant conferrring AbR, E. coli UhpT mutation conferring fosfomycin R, FosA5, H-NS, Kp acrA, Kp OmpK37, marA, msbA, oqxA, SHV-1	Col440I
510096-18	?	4-34-1	200	2754	28	150	KL27		O3b		manB, manC, gmd	mrkA, mrkB, mrkC, mrkD, mrkF, mrkH, mrkI, mrkJ	baeR, CRP, emrB, emrR, E.coli EF-Tu mutants conferring Pulvomycin R, E. coli marR mutant conferrring AbR, E. coli UhpT mutation conferring fosfomycin R, FosA5, H-NS, Kp acrA, Kp OmpK37, marA, msbA, oqxA, SHV-1	Col440I
510119-18	?	2-37-1	915	2759		150	KL107 (none, 10/16)		OL101	rfbA-D	rmlA-D, gmd	kfuA, kfuC, kvgA, mrkA, mrkB, mrkC, mrkD, mrkF, mrkH, mrkI, mrkJ	baeR, CRP, emrB, emrR, E.coli EF-Tu mutants conferring Pulvomycin R, E. coli marR mutant conferrring AbR, E. coli UhpT mutation conferring fosfomycin R, FosA6, H-NS, Kp acrA, Kp OmpK37, marA, msbA, oqxA, SHV-11	IncFIB(K), IncFII(K)
510126-18	?	2-38-1	915	2759		150	KL107 (none, 10/16)		OL101	rfbA-D	rmlA-D, gmd	kfuA, kfuC, kvgA, mrkA, mrkB, mrkC, mrkD, mrkF, mrkH, mrkI, mrkJ	baeR, CRP, emrB, emrR, E.coli EF-Tu mutants conferring Pulvomycin R, E. coli marR mutant conferrring AbR, E. coli UhpT mutation conferring fosfomycin R, FosA6, H-NS, Kp acrA, Kp OmpK37, marA, msbA, oqxA, SHV-11	IncFIB(K), IncFII(K)
510946-19	MVK-05C335	6-13-4	323	3319	61	155	KL62		O5		gmd	mrkA, mrkB, mrkC, mrkD, mrkF, mrkH, mrkI, mrkJ	baeR, CRP, emrB, emrR, E.coli EF-Tu mutants conferring Pulvomycin R, E. coli marR mutant conferrring AbR, E. coli UhpT mutation conferring fosfomycin R, FosA5, H-NS, Kp acrA, Kp OmpK37, marA, msbA, oqxA, SHV-52, tet©	IncFIB(K)
510324-18	MVK-05C157	4-45-1	643	2891	39	160	KL39 (none, 10/20)		O1v1	manB, manC, wbbY, wbbZ	gmd, rfaG	mrkA, mrkH, mrkI	baeR, CRP, emrB, emrR, E.coli EF-Tu mutants conferring Pulvomycin R, E. coli marR mutant conferrring AbR, E. coli UhpT mutation conferring fosfomycin R, FosA5, H-NS, Kp acrA, Kp OmpK37, marA, msbA, oqxA, SHV-26, vgaC	IncFIB(K), IncFII(K), IncR
510025-18	?	5-17-1	2662	2720		163	KL161 (none, 5/18)	Kl107-D1 (none, 9/13)	O4	rfbA - D	wzb, cpsACP, rmlB, wbaP, rmlA	mrkH, mrkI	baeR, CRP, emrB, emrR, E.coli EF-Tu mutants conferring Pulvomycin R, E. coli marR mutant conferrring AbR, E. coli UhpT mutation conferring fosfomycin R, FosA6, H-NS, Kp acrA, Kp OmpK37, marA, msbA, oqxA, SHV-26, vgaC	IncR
510011-18	?	4-16-3	4090	2691	923	173	KL112		O2v2	manB, manC	gmd, wcpO, rfaG	mrkA, mrkB, mrkC, mrkD, mrkF, mrkH, mrkI, mrkJ	baeR, CRP, emrB, emrR, E.coli EF-Tu mutants conferring Pulvomycin R, E. coli marR mutant conferrring AbR, E. coli UhpT mutation conferring fosfomycin R, FosA6, H-NS, Kp acrA, Kp OmpK37, marA, msbA, oqxA, SHV-1	Col440I, IncFIB(pKPHS1)
510038-18	?	4-21-1	12	2726	923	173	KL112		O2v2			mrkA, mrkB, mrkH, mrkI	baeR, CRP, emrB, emrR, E.coli EF-Tu mutants conferring Pulvomycin R, E. coli marR mutant conferrring AbR, E. coli UhpT mutation conferring fosfomycin R, FosA6, H-NS, Kp acrA, Kp OmpK37, marA, msbA, oqxA, SHV-11, vgaC	IncFIB(K), IncFII(K)
510056-18	?	1-23-1	20	2732	939	173	KL102		O2v2		gmd, wcpO, rfaG	mrkA, mrkB, mrkD, mrkF, mrkH, mrkI, mrkJ	baeR, CRP, emrB, emrR, E.coli EF-Tu mutants conferring Pulvomycin R, E. coli marR mutant conferrring AbR, E. coli UhpT mutation conferring fosfomycin R, FosA6, H-NS, Kp acrA, Kp OmpK37, marA, msbA, oqxA, SHV-1	Col440I, IncFIB(K), IncFII(K)
510939-19	MVK-05C328	6-13-1	1426	3315	21	177	KL20		O3/O3a		gmd	mrkA, mrkB, mrkC, mrkD, mrkF, mrkH, mrkI, mrkJ	baeR, CRP, emrB, emrR, E.coli EF-Tu mutants conferring Pulvomycin R, E. coli marR mutant conferrring AbR, E. coli UhpT mutation conferring fosfomycin R, FosA6, H-NS, Kp acrA, Kp OmpK37, marA, msbA, oqxA, SHV-11
510084-18	?	2-32-1	1728	2749	941	180	KL116		O2v1	manB, manC	gmd, rfaG	kfuA, kfuC, mrkA, mrkB, mrkC, mrkD, mrkF, mrkH, mrkI, mrkJ	baeR, CRP, emrB, emrR, E.coli EF-Tu mutants conferring Pulvomycin R, E. coli marR mutant conferrring AbR, E. coli UhpT mutation conferring fosfomycin R, FosA5, H-NS, Kp acrA, Kp OmpK37, marA, msbA, oqxA, SHV-11, vgaC	Col440I, IncFIB(K), IncFII(K)
510087-18	?	2-32-4	1758	2750	28	187	KL27		O4		gmd	kvgA, mrkA, mrkB, mrkC, mrkD, mrkF, mrkH, mrkI, mrkJ	baeR, CRP, emrB, emrR, E.coli EF-Tu mutants conferring Pulvomycin R, E. coli marR mutant conferrring AbR, E. coli UhpT mutation conferring fosfomycin R, FosA6, H-NS, Kp acrA, Kp OmpK37, marA, msbA, oqxA, SHV-1	IncFIB(K)
510088-18	?	4-32-1	1758	2750	28	187	KL27		O4		gmd	mrkA, mrkB, mrkC, mrkD, mrkF, mrkH, mrkI, mrkJ	baeR, CRP, emrB, emrR, E.coli EF-Tu mutants conferring Pulvomycin R, E. coli marR mutant conferrring AbR, E. coli UhpT mutation conferring fosfomycin R, FosA6, H-NS, Kp acrA, Kp OmpK37, marA, msbA, oqxA, SHV-1	IncFIB(K)
510035-18	?	2-21-2	611	2725	930	193	KL125		O3b		manB, manC, gmd	mrkA, mrkB, mrkC, mrkD, mrkF, mrkH, mrkI, mrkJ	baeR, CRP, emrB, emrR, E.coli EF-Tu mutants conferring Pulvomycin R, E. coli marR mutant conferrring AbR, E. coli UhpT mutation conferring fosfomycin R, FosA6, H-NS, Kp OmpK37, marA, msbA, oqxA, SHV-27, vgaC	IncR
510078-18	?	1-30-3	2459	2747	930	193	KL125		O3b		manB, manC, gmd	mrkA, mrkB, mrkD, mrkF, mrkH, mrkI, mrkJ	baeR, CRP, emrB, emrR, E.coli EF-Tu mutants conferring Pulvomycin R, E. coli marR mutant conferrring AbR, E. coli UhpT mutation conferring fosfomycin R, FosA6, H-NS, Kp OmpK37, marA, msbA, oqxA, SHV-1	Col440II
510386-18	MVK-05C219	6-48-1	1487	2883		197	KL141 (none, 16/22)		O4		gmd	mrkA, mrkB, mrkC, mrkD, mrkF, mrkH, mrkI, mrkJ	baeR, CRP, emrB, emrR, E.coli EF-Tu mutants conferring Pulvomycin R, E. coli marR mutant conferrring AbR, E. coli UhpT mutation conferring fosfomycin R, FosA5, H-NS, Kp acrA, Kp OmpK37, marA, msbA, oqxA, SHV-11	IncR
510034-18	?	2-21-1	632	2724		202	KL141		O4	rfbA - D, manB, manC	gmd	kfuA, kfuC, kvgA, mrkA, mrkB, mrkC, mrkD, mrkF, mrkH, mrkI, mrkJ	baeR, CRP, emrB, emrR, E.coli EF-Tu mutants conferring Pulvomycin R, E. coli marR mutant conferrring AbR, E. coli UhpT mutation conferring fosfomycin R, FosA6, H-NS, Kp acrA, Kp OmpK37, marA, msbA, oqxA, SHV-108
510049-18	?	4-22-1	632	2724		202	KL141		O4	rfbA - D, manB, manC	gmd	kfuA, kfuB, kfuC, mrkA, mrkB, mrkC, mrkD, mrkF, mrkH, mrkI, mrkJ	baeR, CRP, emrB, emrR, E.coli EF-Tu mutants conferring Pulvomycin R, E. coli marR mutant conferrring AbR, E. coli UhpT mutation conferring fosfomycin R, FosA6, H-NS, Kp acrA, Kp OmpK37, marA, msbA, oqxA, SHV-108
510031-18	?	6-20-2	26	2723	44	267	KL142 (none, 16/21)		O1v1	rfbA - D, wbbY, wbbZ	gmd, rfaG	mrkA, mrkB, mrkC, mrkD, mrkF, mrkH, mrkI, mrkJ	acrD, APH(3")-lb, APH(6)-ld, baeR, CRP, emrB, emrR, E.coli EF-Tu mutants conferring Pulvomycin R, E. coli marR mutant conferrring AbR, E. coli UhpT mutation conferring fosfomycin R, FosA5, H-NS, Kp acrA, marA, msbA, SHV-36, vgaC
510072-18	?	6-29-1	3640	2742	64	333	KL64		O1v1	rfbA-D, manB, manC, wbbY, wbbZ	rfaG, gmd	mrkA, mrkF, mrkH, mrkI, mrkJ	baeR, CRP, emrB, emrR, E.coli EF-Tu mutants conferring Pulvomycin R, E. coli marR mutant conferrring AbR, E. coli UhpT mutation conferring fosfomycin R, FosA5, H-NS, Kp acrA, Kp OmpK37, marA, msbA, oqxA, SHV-40, vgaC	Col440I, IncFIB(K), IncFII(K), IncR
510836-19	MVK-05C225	6-48-1	200	3239	932	354	KL114		O3b	manB, manC	manB, manC, gmd	KP1_1371, allB, allD, allS, hyi, mrkA, mrkC, mrkD, mrkH, mrkI, ybbW	baeR, CRP, emrB, emrR, E.coli EF-Tu mutants conferring Pulvomycin R, E. coli marR mutant conferrring AbR, E. coli UhpT mutation conferring fosfomycin R, FosA5, H-NS, Kp acrA, Kp OmpK37, marA, msbA, oqxA, SHV-1	Col440I
510003-18	?	6-15-3	2426	2686		356	KL117		O2v2	manB, manC	gmd, wcpO, rfaG	mrkA, mrkB, mrkC, mrkD, mrkF, mrkH, mrkI, mrkJ	baeR, CRP, emrB, emrR, E.coli EF-Tu mutants conferring Pulvomycin R, E. coli marR mutant conferrring AbR, E. coli UhpT mutation conferring fosfomycin R, FosA6, H-NS, Kp acrA, Kp OmpK37, marA, msbA, oqxA, SHV-27
510026-18	?	5-17-2	4092	2809		356	KL117		O2v2	manB, manC	gmd, wcpO, rfaG	mrkA, mrkB, mrkC, mrkD, mrkF, mrkH, mrkI, mrkJ	APH(3")-lb, APH(6)-ld,baeR, CRP, emrB, emrR, E.coli EF-Tu mutants conferring Pulvomycin R, E. coli marR mutant conferrring AbR, E. coli UhpT mutation conferring fosfomycin R, FosA6, H-NS, Kp acrA, Kp OmpK37, marA, msbA, oqxA, SHV-1, vgaC	IncFIB(K), IncFII(K), IncR
510334-18	MVK-05C167	4-45-3	730	2895		356	KL117 (none, 12/20)		O1/O2v2, none, 6/10, 98%	manB, manC, wbbZ	gmd	mrkA, mrkD, mrkH, mrkI	baeR, CRP, emrB, emrR, E.coli EF-Tu mutants conferring Pulvomycin R, E. coli marR mutant conferrring AbR, E. coli UhpT mutation conferring fosfomycin R, FosA5, H-NS, Kp acrA, Kp OmpK37, marA, msbA, oqxA, SHV-1, vgaC	IncFIB(K), IncFII(K), IncR
510941-19	MVK-05C330	6-13-3	1825	3314		361	KL126		OL101	rmlC,	gmd, rmlB	mrkA, mrkB, mrkC, mrkD, mrkF, mrkH, mrkI, mrkJ	baeR, CRP, emrB, emrR, E.coli EF-Tu mutants conferring Pulvomycin R, E. coli marR mutant conferrring AbR, E. coli UhpT mutation conferring fosfomycin R, FosA6, H-NS, Kp acrA, Kp OmpK37, marA, msbA, oqxA, SHV-11, vgaC	IncFIB(K), IncFII(K)
510021-18	?	4-17-1	105	2696	939	383	KL102		O2v2			fyuA, irp1, irp2,mceA, mceB, mceC, mceD, mceE, mceG, mceH, mceI, mceJ, mrkA, mrkB, mrkC, mrkD, mrkF, mrkH, mrkI, mrkJ, ybtA, ybtE, ybtP, ybtQ, ybtS, ybtT, ybtU, ybtX	baeR, CRP, emrB, emrR, E.coli EF-Tu mutants conferring Pulvomycin R, E. coli marR mutant conferrring AbR, E. coli UhpT mutation conferring fosfomycin R, FosA6, H-NS, Kp acrA, Kp OmpK37, marA, msbA, oqxA, SHV-1	Col440I, IncFIB(pKPHS1)
510880-19	MVK-05C269	4-6-1	200	3277	23	385	KL22 (none, 13/18, 99%)		O3b		gmd, manC,	mrkA, mrkB, mrkC, mrkD, mrkF, mrkH, mrkI, mrkJ	baeR, CRP, emrB, emrR, E.coli EF-Tu mutants conferring Pulvomycin R, E. coli marR mutant conferrring AbR, E. coli UhpT mutation conferring fosfomycin R, FosA5, H-NS, Kp acrA, Kp OmpK37, marA, msbA, oqxA, SHV-1, vgaC	IncFII, IncR
510919-19	MVK-05C308	6-10-1	279	3280	937	415	KL151		O5	rfbA-D		fyuA, irp1, irp2, mrkA, mrkB, mrkC, mrkD, mrkH, mrkI, mrkJ, ybtA, ybtE, ybtP, ybtQ, ybtS, ybtT, ybtU, ybtX	baeR, CRP, emrB, emrR, E.coli EF-Tu mutants conferring Pulvomycin R, E. coli marR mutant conferrring AbR, E. coli UhpT mutation conferring fosfomycin R, FosA6, H-NS, Kp acrA, Kp OmpK37, marA, msbA, oqxA, SHV-11, vgaC	IncFIB(K), IncFII
510005-18	?	2-16-1	1265	2688			KL33 (none), 9/21	KL30-D1 (6/11	O3b		gmd, manC	mrkA, mrkB, mrkC, mrkD, mrkF, mrkH, mrkI, mrkJ	baeR, CRP, emrB, emrR, E.coli EF-Tu mutants conferring Pulvomycin R, E. coli marR mutant conferrring AbR, E. coli UhpT mutation conferring fosfomycin R, FosA5, H-NS, Kp acrA, marA, msbA, oqxA, SHV-36, vgaC	Col440II, IncFIB(Mar), IncHL1B
510010-18	?	4-16-2	1265	2688			KL33 (none), 9/21	KL30-D1	O3b		wcaJ, manB, gmd, manC	mrkA, mrkB, mrkC, mrkD, mrkF, mrkH, mrkI, mrkJ	baeR, CRP, emrB, emrR, E.coli EF-Tu mutants conferring Pulvomycin R, E. coli marR mutant conferrring AbR, E. coli UhpT mutation conferring fosfomycin R, FosA5, H-NS, Kp acrA, marA, msbA, oqxA, SHV-36, vgaC	IncFIB(Mar), IncHI1B
510326-18	MVK-05C159	4-45-3	1334	2892			OCL6 (none, 0/10, 66% ident., 16% cov)		O3/O3a			mrkA, mrkB, mrkC, mrkD, mrkF, mrkH, mrkI, mrkJ	baeR, CRP, emrB, emrR, E.coli EF-Tu mutants conferring Pulvomycin R, E. coli marR mutant conferrring AbR, E. coli UhpT mutation conferring fosfomycin R, FosA6, H-NS, Kp acrA, Kp OmpK37, marA, msbA, oqxA, SHV-164, vgaC	incFIB(pQil), IncFII(K), IncR
